# Supplementary material for: What women think about consent to research at the time of an obstetric emergency: a qualitative study of the views of a cohort of World Maternal Antifibrinolytic Trial participants
Source: PubMed Central journal article supplement — BJOG. 2018 Jul 31;125(13):1744–53. doi: 10.1111/1471-0528.15333 (PMC6283048; doi:10.1111/1471-0528.15333), 2018-07-31
Supplement: BJO-125-1744-s001.pdf [file BJO-125-1744-s001.pdf]

**Table S1.** Theme 1 Too much too process

| <b>Participants who gave their written consent at time of trial entry</b>                                                                                                                                                                                                                            | <b>Participants for whom a consent waiver was used</b>                                                                                                                                                                                                                                                                                                                                                                        |
|------------------------------------------------------------------------------------------------------------------------------------------------------------------------------------------------------------------------------------------------------------------------------------------------------|-------------------------------------------------------------------------------------------------------------------------------------------------------------------------------------------------------------------------------------------------------------------------------------------------------------------------------------------------------------------------------------------------------------------------------|
| I can't remember. I remember signing something, but it could have been just to the theatre. I don't know C10                                                                                                                                                                                         | I was just completely out of it. Drained physically, emotionally. I did get asked to do something afterwards but I don't know if it was about this According to my partner I was asked to sign something as I was being wheeled down to theatre. I can't remember anything. I think it was possibly the consent form, but I don't know. It could have been the research I am not sure. I can't remember signing anything. W02 |
| I can't remember, I think it was one of the midwives. It was someone that came around. I don't know C02                                                                                                                                                                                              | I know that people did speak to me. There was obviously a doctor that came and spoke to me and she was explaining stuff, but you don't take it all in do you? I didn't take it in on a medical level. I just know that I'd haemorrhaged. W13                                                                                                                                                                                  |
| All I remember is being in labour a long time. And then I just remember people squiggling down on me stomach and saying <i>Do you want to try this?</i> I can't remember. I said <i>Yeah I'll sign it whatever it is.</i> C08                                                                        | I wouldn't wish it on anyone to go through that. It's in the back of my brain and I try not to think about. W01                                                                                                                                                                                                                                                                                                               |
| It's difficult isn't it? Because when you go through the birth you don't really remember it. C04                                                                                                                                                                                                     | So they did come to talk to me [before leaving hospital], but I can't remember. D02                                                                                                                                                                                                                                                                                                                                           |
| I was asked to consent for them to research about what happened to me in the emergency situation and how they dealt with it. Well that's all I can remember. Was there medication involved? Was there like a placebo like type medication, where I wasn't told which one I was receiving? C04        |                                                                                                                                                                                                                                                                                                                                                                                                                               |
| My recollection of it was when I was sort of in and out of consciousness with blood loss and they said <i>Do we have permission to give you a trial? Erm it may be, or it might be a placebo, I don't know.</i> So I said <i>Yeah.</i> Obviously, <i>Yes. Give me anything. Whatever I need.</i> C09 |                                                                                                                                                                                                                                                                                                                                                                                                                               |
