# Supplementary material for: What women think about consent to research at the time of an obstetric emergency: a qualitative study of the views of a cohort of World Maternal Antifibrinolytic Trial participants
Source: PubMed Central journal article supplement — BJOG. 2018 Jul 31;125(13):1744–53. doi: 10.1111/1471-0528.15333 (PMC6283048; doi:10.1111/1471-0528.15333), 2018-07-31
Supplement: BJO-125-1744-s002.pdf [file BJO-125-1744-s002.pdf]

**Table S2.** Theme 2 Quality of Relationships

| <b>Participants who gave their written consent at time of trial entry</b>                                                                                                                                                     | <b>Participants for whom a consent waiver was used</b>                                                                                                                                                                                                    |
|-------------------------------------------------------------------------------------------------------------------------------------------------------------------------------------------------------------------------------|-----------------------------------------------------------------------------------------------------------------------------------------------------------------------------------------------------------------------------------------------------------|
| If they're having an emergency and you think they need to take a chance in that trial thing then you should do it. C02                                                                                                        | I went to see (consultant first name), yeah the man who saved my life. He brought me in 4 weeks later and we had coffee and we talked and we cried, he just kept apologising and it wasn't that man's fault. W01                                          |
| "I think the staff always have your best interests at heart" C05.                                                                                                                                                             | I mean ultimately, unless you're in the profession, you don't really know what's going on do you?" Partner of W16.                                                                                                                                        |
| Patient:I do specifically remember him saying to me though is it alright if we give you this<br>Partner:I can remember that<br><br>Patient: that was that Andy wasn't it<br>Partner:Yeah he was good him<br>Patient:Yeah. C09 | I mean it obviously saved my life I'm still here aren't I? W22                                                                                                                                                                                            |
| I just remember the doctors attending to me and giving me all this information and they looked after me really well. C04                                                                                                      | It doesn't bother me taking part in any research you know because to me that's how we progress, if no one took part in research we wouldn't be where we are today medically and my life may not have been saved W02                                       |
| I think when you go in there you're in the hands of the doctors anyway and so whatever it is they decide they're gonna give ya you just take it a don't ya? C08                                                               | I think he (partner) should know that I am involved in it but as far as the decision then that's actually up to the woman isn't it, at the end of the day it's their body, they have gone through the experience, all the partner's done is be there. W20 |
| There wasn't one point where I felt <i>What have they done?</i> or <i>What have they put me (in)?</i> I felt really safe the whole time. C05                                                                                  |                                                                                                                                                                                                                                                           |
| At the time I reckon they (doctors) probably know best. C10                                                                                                                                                                   |                                                                                                                                                                                                                                                           |
