# Supplementary material for: What women think about consent to research at the time of an obstetric emergency: a qualitative study of the views of a cohort of World Maternal Antifibrinolytic Trial participants
Source: PubMed Central journal article supplement — BJOG. 2018 Jul 31;125(13):1744–53. doi: 10.1111/1471-0528.15333 (PMC6283048; doi:10.1111/1471-0528.15333), 2018-07-31
Supplement: BJO-125-1744-s003.pdf [file BJO-125-1744-s003.pdf]

**Table S3.** Theme 3 Making it Right

| <b>Participants who gave their written consent at time of trial entry</b>                                                                                                                                                                            | <b>Participants for whom a consent waiver was used</b>                                                                                                                                                                                                                                                                                       |
|------------------------------------------------------------------------------------------------------------------------------------------------------------------------------------------------------------------------------------------------------|----------------------------------------------------------------------------------------------------------------------------------------------------------------------------------------------------------------------------------------------------------------------------------------------------------------------------------------------|
| <p>....the signing of it was a pain I was like I don't need to deal with anything like that right now. C08</p>                                                                                                                                       | <p>I think everybody should <b>have to do it</b>" I just can't see why women wouldn't do it (sighs). If there's a form (antenatally), just sign then at least you (clinicians) can say well we tried we've given you the information and if you don't then well just get on with it. W01</p>                                                 |
| <p>I don't think if somebody had started waving a leaflet in my face and trying to read it I would have probably been whacked it away. The best way for me was for it to be verbal first and then the written and an explanation afterwards. C09</p> | <p>I mean the way they've done it hasn't bothered me personally but you know if you are able to discuss it before it might have been nice to know what you're taking part in and why and what you're doing W02</p>                                                                                                                           |
| <p>If I didn't know about it I wouldn't have been bothered. I would have been like nice one thanks very much. C08</p>                                                                                                                                | <p>I personally would like to go and listen to somebody. Sometimes if you are given a leaflet nine times out of ten people aren't gonna fully read the leaflet are they? But then can you do that? You can't physically go around and speak to everybody can you? Can it not be brought in like an antenatal session? W12</p>                |
| <p>Maybe another idea would be to, when they (women) register at the hospital at the beginning of their pregnancy to ask them then if they would be interested in taking part in any research further down the line. C04</p>                         | <p>Maybe just go through it at your last Midwife appointment or something and say you know this is a research project going on, this is what will happen and in emergency cases in case of blady blah we could do this not like let them sign a dotted line there but while they are in good frame of mind maybe just go through it" W20</p> |
