# Supplementary material for: What women think about consent to research at the time of an obstetric emergency: a qualitative study of the views of a cohort of World Maternal Antifibrinolytic Trial participants
Source: PubMed Central journal article supplement — BJOG. 2018 Jul 31;125(13):1744–53. doi: 10.1111/1471-0528.15333 (PMC6283048; doi:10.1111/1471-0528.15333), 2018-07-31
Supplement: BJO-125-1744-s005.pdf [file BJO-125-1744-s005.pdf]

**Appendix S2.** A priori, codes grounded in the data, and basic, organising and global theme

| <i>A priori codes</i>                                    | <b>Codes grounded in data</b>                                                                           | <b>Basic themes</b>                                                                                                              | <b>Organising themes</b>                                                                                                                                                  | <b>Global theme</b>                                                                                                                                                                                                   |
|----------------------------------------------------------|---------------------------------------------------------------------------------------------------------|----------------------------------------------------------------------------------------------------------------------------------|---------------------------------------------------------------------------------------------------------------------------------------------------------------------------|-----------------------------------------------------------------------------------------------------------------------------------------------------------------------------------------------------------------------|
| <b>Experience of consent process for the WOMAN Trial</b> | Childbirth as a significant life event                                                                  | <b>Lives in transition amidst significant life event(s)</b>                                                                      | <b>Too much too process: Contextualising decision-making as determined by gravity of emergency situation and significance of events immediately before and afterwards</b> | Complexity of communicating about research in emergency situations demands a <b>Humane choreography of clinical, emotional, and ethical considerations when negotiating consent to research in emergency settings</b> |
|                                                          | PPH as a life-threatening/important life event                                                          |                                                                                                                                  |                                                                                                                                                                           |                                                                                                                                                                                                                       |
|                                                          | Confusion surrounding situation: what was clinical care and what was research                           | <b>Emotional, sensory, and physical overload</b>                                                                                 |                                                                                                                                                                           |                                                                                                                                                                                                                       |
|                                                          | Drama, trauma and information onslaught                                                                 |                                                                                                                                  |                                                                                                                                                                           |                                                                                                                                                                                                                       |
|                                                          | (Non)significance of signature                                                                          | <b>No space for informed decision-making</b>                                                                                     |                                                                                                                                                                           |                                                                                                                                                                                                                       |
|                                                          | Uncertainty surrounding who informed or consented women to the WOMAN Trial                              |                                                                                                                                  |                                                                                                                                                                           |                                                                                                                                                                                                                       |
| Uncomprehending consciousness or unconscious             |                                                                                                         |                                                                                                                                  |                                                                                                                                                                           |                                                                                                                                                                                                                       |
| <b>Views of deferred consent at time of emergency</b>    | Confidence, trust and respect in health professionals                                                   | <b>Degree of trust, confidence and respect in health professionals</b>                                                           | <b>Quality of relationships: Trust, communication, interaction and respectfulness</b>                                                                                     |                                                                                                                                                                                                                       |
|                                                          | Mistrust of health professionals – they, them and us                                                    |                                                                                                                                  |                                                                                                                                                                           |                                                                                                                                                                                                                       |
| <b>Preferred method of consent</b>                       | Research accepted part of care – if you have the chance...                                              | <b>Faith in research intervention: Believe done to them in good faith and whatever they had it worked for them</b>               |                                                                                                                                                                           |                                                                                                                                                                                                                       |
|                                                          | It worked for me...                                                                                     |                                                                                                                                  |                                                                                                                                                                           |                                                                                                                                                                                                                       |
| <b>Future guidance</b>                                   | Trust in and role of partner/next of kin                                                                | <b>Belief partners should be included in the discussion but degree of involvement in actual decision depends on relationship</b> |                                                                                                                                                                           |                                                                                                                                                                                                                       |
|                                                          | What works for one woman might not work for another, different to self                                  |                                                                                                                                  |                                                                                                                                                                           |                                                                                                                                                                                                                       |
|                                                          | Realisation during interview what actually did for research                                             | <b>It's more the doing it in the right way, rather than what is actually done, that can make it right or wrong</b>               | <b>Making it right: Human rights, realisation, resolution and recommendations</b>                                                                                         |                                                                                                                                                                                                                       |
|                                                          | Testing, trialling and being a guinea pig                                                               |                                                                                                                                  |                                                                                                                                                                           |                                                                                                                                                                                                                       |
| When, what's right and what's wrong                      | <b>Women are not willing to give up their basic human rights when unconscious or unable to remember</b> |                                                                                                                                  |                                                                                                                                                                           |                                                                                                                                                                                                                       |
| Appreciation of consent dilemma                          |                                                                                                         |                                                                                                                                  |                                                                                                                                                                           |                                                                                                                                                                                                                       |
| What was okay, but...                                    | <b>Reconciling what happened to them with what might be better for others in the future</b>             |                                                                                                                                  |                                                                                                                                                                           |                                                                                                                                                                                                                       |
| Missed opportunities for a better way                    |                                                                                                         |                                                                                                                                  |                                                                                                                                                                           |                                                                                                                                                                                                                       |
